# Supplementary material
Source: publisher figshare collection journal article supplement (https://acs.figshare.com/ndownloader/files/4010620)
Supplement: Supplementary file 1 [file 4010620]

# Spectroscopic Study of $\delta$ Electron Transfer between Two Covalently Bonded Dimolybdenum Units via a Conjugated Bridge

Chun Y. Liu,\* Xuan Xiao, Miao Meng, Yu Zhang and Mei Juan Han

Department of Chemistry, Jinan University, Guangzhou 510632, P. R. China.

Department of Chemistry, Tongji University, Shanghai 200092, P. R. China.

## Supporting Information

### Contents

Page S-2:

**Figure S1.** Vis-Near-IR spectra of the neutral dimolybdenum dimers.

**Figure S2.** Vis-Near-IR-mid-IR spectra of  $\{[\text{Mo}_2(\text{DAniF})_3]_2(\mu\text{-O}_2\text{CC}_6\text{H}_4\text{CO}_2)\}\text{PF}_6$ .

Page S-3:

**Figure S3.** Vis-Near-IR-mid-IR spectra of  $\{[\text{Mo}_2(\text{DAniF})_3]_2(\mu\text{-OSCC}_6\text{H}_4\text{COS})\}\text{PF}_6$ .

**Figure S4.** Vis-Near-IR-mid-IR spectra of  $\{[\text{Mo}_2(\text{DAniF})_3]_2(\mu\text{-S}_2\text{CC}_6\text{H}_4\text{CS}_2)\}\text{PF}_6$ .

Page S-4:

**Figure S5.** Vis-Near-IR-mid-IR spectra of  $\{[\text{Mo}_2(\text{DAniF})_3]_2(\mu\text{-O}_2\text{CC}_6\text{H}_4\text{CS}_2)\}\text{PF}_6$ .

**Figure S6.** CV of  $\text{Mo}_2(\text{DAniF})_3(\mu\text{-S}_2\text{CC}_6\text{H}_5)$ .

Page S-5:

**Figure S7.** DPV of  $\text{Mo}_2(\text{DAniF})_3(\mu\text{-S}_2\text{CC}_6\text{H}_5)$ .

**Figure S8.** CV of  $\text{Mo}_2(\text{DAniF})_3(\mu\text{-O}_2\text{CC}_6\text{H}_5)$ .

**Figure S9.** DPV of  $\text{Mo}_2(\text{DAniF})_3(\mu\text{-O}_2\text{CC}_6\text{H}_5)$ .

Page S-6:

**Table S1.** Electronic coupling matrix elements from Mulliken-Hush equation.

Page S-7:

**Table S2.** Effective energy gaps ( $\Delta E_{ML}^{eff}$ ) and effective coupling constants ( $H_{ML}^{eff}$ ) for metal to ligand transition.

**Table S3.** Effective energy gaps ( $\Delta E_{LM}^{eff}$ ) and effective coupling constants ( $H_{LM}^{eff}$ ) for ligand to metal transition.

Page S-8:

**Table S4.** Comparison between  $H_{ab}$  from Hush model and  $H_{MM'}$  from CNS model.

**Table S5.** Electron transfer kinetics for the symmetrical complexes based on the electronic coupling matrix elements from Hush and CNS methods.

Page S-9:

**Table S6.** Electron transfer kinetics for the unsymmetrical complexes based on the electronic coupling matrix elements from CNS methods.

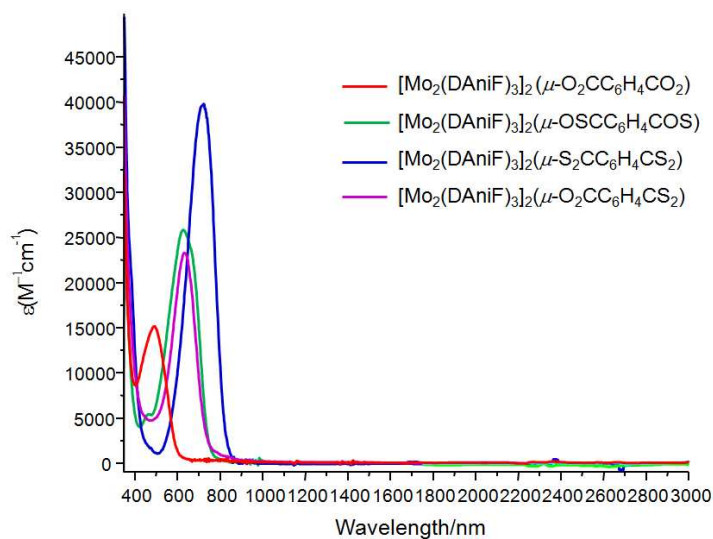

**Figure S1.** Vis-Near-IR spectra of the neutral dimolybdenum dimers, recorded in the  $\text{CH}_2\text{Cl}_2$  solutions at room temperature.

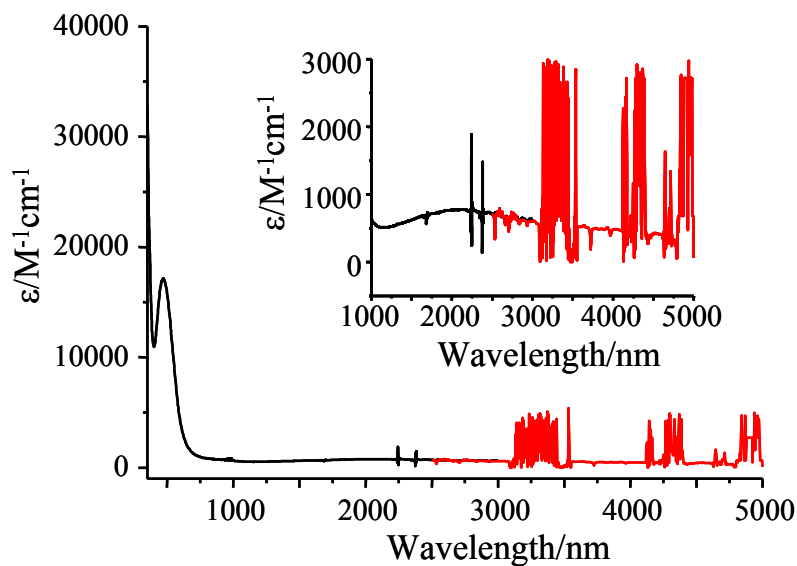

**Figure S2.** Combined Vis-Near-IR (black) and IR spectra (red) for  $\{[\text{Mo}_2(\text{DAniF})_3]_2(\mu\text{-O}_2\text{CC}_6\text{H}_4\text{CO}_2)\} \text{PF}_6$  in  $\text{CH}_2\text{Cl}_2$  solution at room temperature.

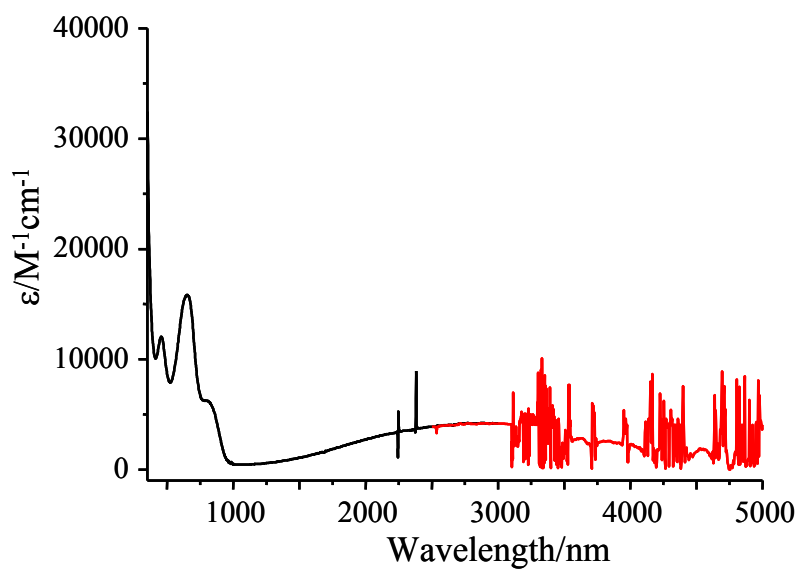

**Figure S3.** Combined Vis-Near-IR (black) and IR spectra (red) for  $\{[\text{Mo}_2(\text{DAniF})_3]_2(\mu\text{-OSCC}_6\text{H}_4\text{COS})\}\text{PF}_6$  in  $\text{CH}_2\text{Cl}_2$  solution at room temperature.

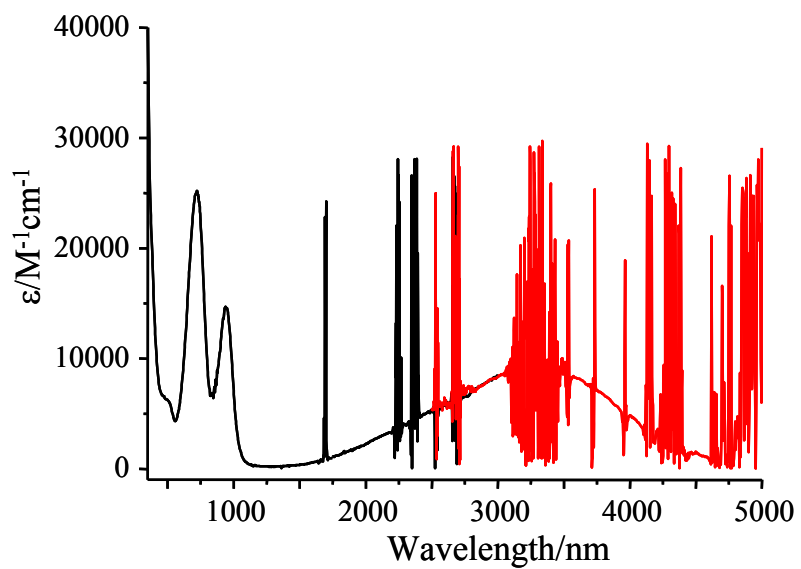

**Figure S4.** Combined Vis-Near-IR (black) and IR spectra (red) for  $\{[\text{Mo}_2(\text{DAniF})_3]_2(\mu\text{-S}_2\text{CC}_6\text{H}_4\text{CS}_2)\}\text{PF}_6$  in  $\text{CH}_2\text{Cl}_2$  solution at room temperature.

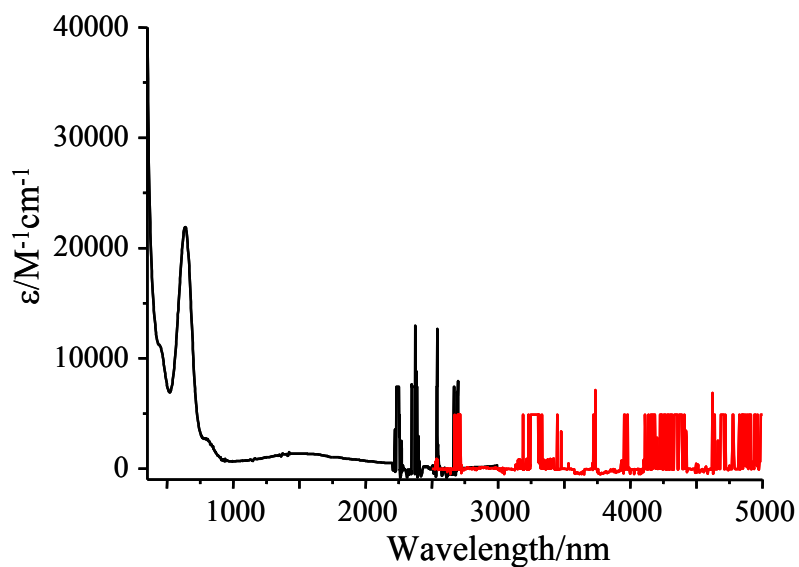

**Figure S5.** Combined Vis-Near-IR (black) and IR spectra (red) for  $\{[\text{Mo}_2(\text{DAniF})_3]_2(\mu\text{-O}_2\text{CC}_6\text{H}_4\text{CS}_2)\}\text{PF}_6$  in  $\text{CH}_2\text{Cl}_2$  solution at room temperature.

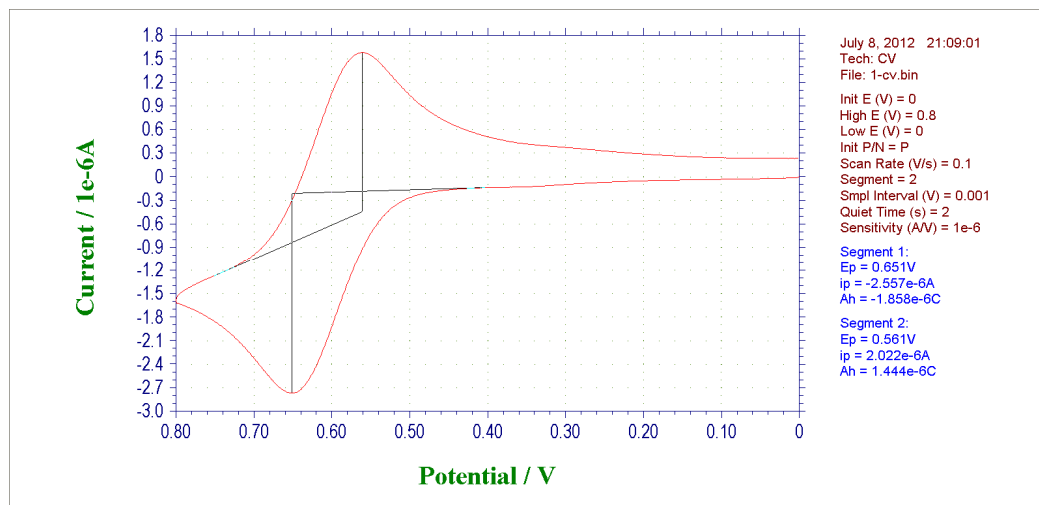

**Figure S6.** CV of  $\text{Mo}_2(\text{DAniF})_3(\mu\text{-S}_2\text{CC}_6\text{H}_5)$ .  $E_{\text{ox}} = 0.651 \text{ V}$ ,  $E_{\text{red}} = 0.561 \text{ V}$  (vs  $\text{Ag}/\text{AgCl}$ ).

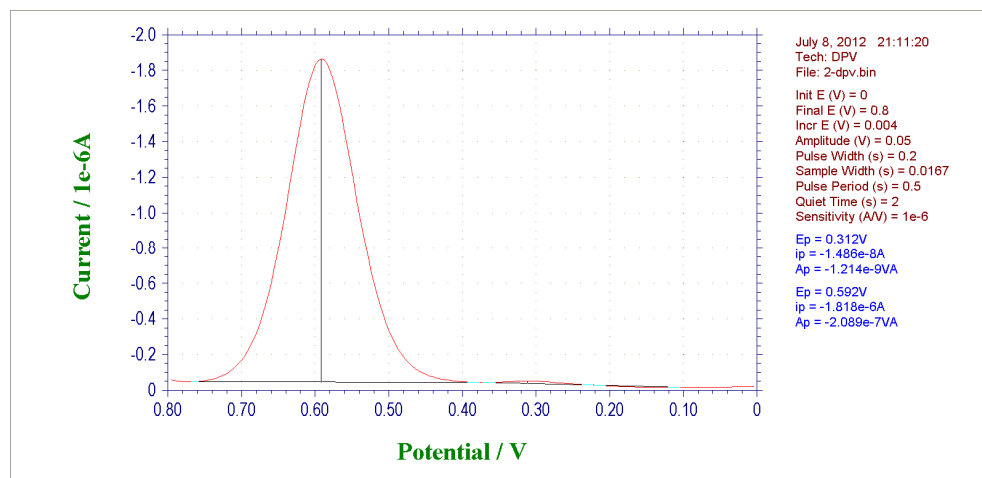

**Figure S7.** DPV of  $\text{Mo}_2(\text{DAniF})_3(\mu\text{-S}_2\text{CC}_6\text{H}_5)$ . Half-wave potential  $E_p = 0.592\text{ V}$  (vs Ag/AgCl)

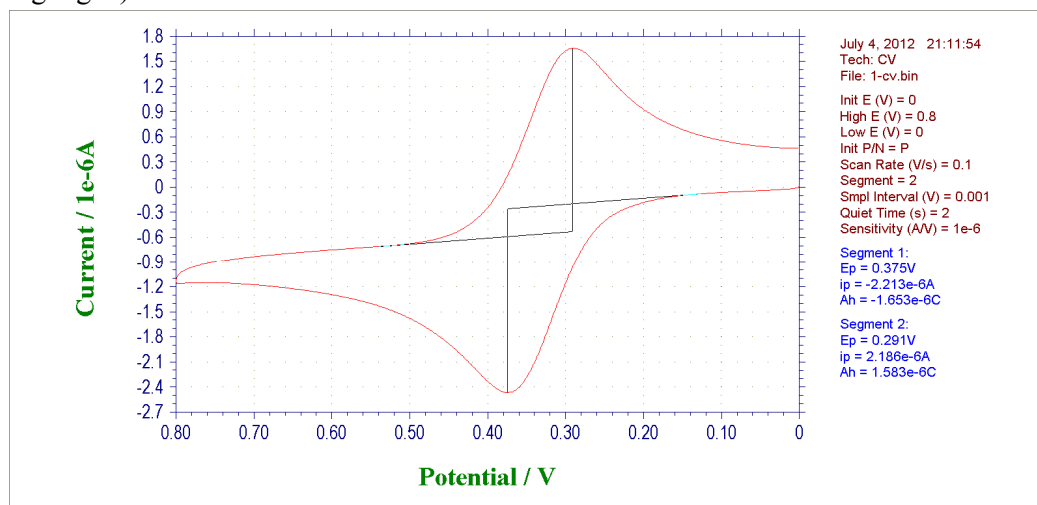

**Figure S8.** CV of  $\text{Mo}_2(\text{DAniF})_3(\mu\text{-O}_2\text{CC}_6\text{H}_5)$ .  $E_{ox} = 0.375\text{ V}$ ,  $E_{red} = 0.291\text{ V}$  (vs Ag/AgCl)

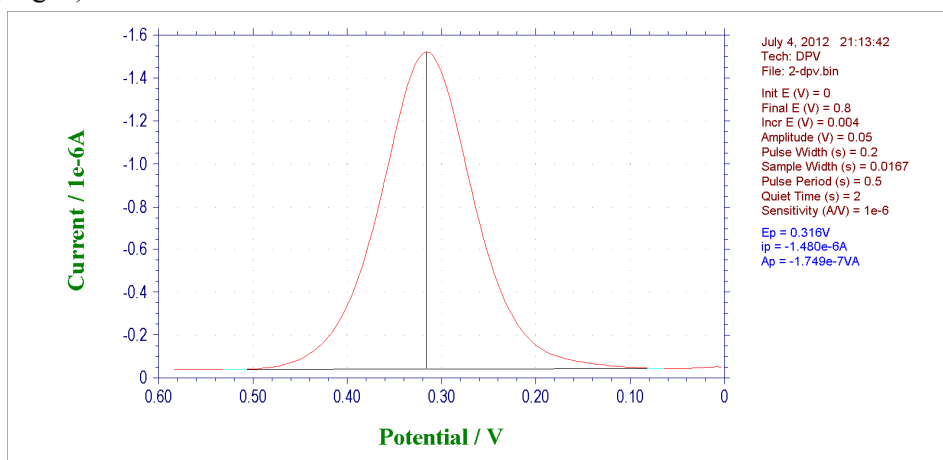

**Figure S9.** DPV of  $\text{Mo}_2(\text{DAniF})_3(\mu\text{-O}_2\text{CC}_6\text{H}_5)$ . Half-wave potential  $E_p = 0.316\text{ V}$  (vs Ag/AgCl)

**Table S1.** Electronic coupling matrix elements from Mulliken-Hush equation.

| complex                                        | $r_{ab}$<br>(Å) | $r_{ab}'$<br>(Å) | $E_{IT}$<br>(cm <sup>-1</sup> ) | $\varepsilon_{IT}$<br>(M <sup>-1</sup> cm <sup>-1</sup> ) | cal. $\Delta\nu_{1/2}$<br>(cm <sup>-1</sup> ) | exp. $\Delta\nu_{1/2}$<br>(cm <sup>-1</sup> ) | $H_{ab}$<br>(cm <sup>-1</sup> )<br>( $r_{ab}$ ) | $H_{ab}$<br>(cm <sup>-1</sup> )<br>( $r_{ab}'$ ) |
|------------------------------------------------|-----------------|------------------|---------------------------------|-----------------------------------------------------------|-----------------------------------------------|-----------------------------------------------|-------------------------------------------------|--------------------------------------------------|
| [O <sub>2</sub> -O <sub>2</sub> ] <sup>+</sup> | 11.2            | 5.8              | 4240                            | 1470                                                      | 3190                                          | 4410                                          | 304                                             | 589                                              |
| [OS-OS] <sup>+</sup>                           | 11.6            | 5.8              | 3440                            | 3690                                                      | 2820                                          | 3290                                          | 360                                             | 727                                              |
| [S <sub>2</sub> -S <sub>2</sub> ] <sup>+</sup> | 12.2            | 5.8              | 2640                            | 12660                                                     | 2470                                          | 1770                                          | 410                                             | 864                                              |
| [O <sub>2</sub> -S <sub>2</sub> ] <sup>+</sup> | 11.7            | 5.8              | 6560                            | 2270                                                      | 3890                                          | 4130                                          | NA                                              | NA                                               |

The  $H_{ab}$  values were calculated by Hush model (eq. 1). Calculated bandwidth at half-height, cal. $\Delta\nu_{1/2}$ , was determined from eq. 2. Electron transfer distance  $r_{ab}$  was the [Mo<sub>2</sub>]...[Mo<sub>2</sub>] separation determined from the X-ray structure. Effective electron transfer distance,  $r_{ab}' = 5.8$  Å, was the geometrical length of the bridging group “-CC<sub>6</sub>H<sub>4</sub>C-”. Spectroscopic data were extracted from the spectra of the mixed-valence complexes [Mo<sub>2</sub>-Mo<sub>2</sub>]<sup>+</sup> as seen in Figures 1, 2, 3 and 4.

$$Hab = \frac{2.06 \times 10^{-2}}{r} (\varepsilon_{IT} \Delta \nu_{1/2} E_{IT})^{1/2} \quad (1)$$

$$cal.\Delta \nu_{1/2} = (2310 E_{IT})^{1/2} \quad (2)$$

**Table S2.** Effective energy gaps ( $\Delta E_{ML}^{eff}$ ) and effective coupling constants ( $H_{ML}^{eff}$ ) for metal to ligand transition.

| complex                           | $r_{ML}$<br>(Å) | $E_{ML}$<br>(cm <sup>-1</sup> ) | $\varepsilon_{ML}$<br>(M <sup>-1</sup> cm <sup>-1</sup> ) | $\Delta\nu_{1/2}$<br>(cm <sup>-1</sup> ) | $H_{ML}$<br>(cm <sup>-1</sup> ) | $\Delta E_{ML}^{eff}$<br>(cm <sup>-1</sup> ) | $H_{ML}^{eff}$<br>(cm <sup>-1</sup> ) |
|-----------------------------------|-----------------|---------------------------------|-----------------------------------------------------------|------------------------------------------|---------------------------------|----------------------------------------------|---------------------------------------|
| [O <sub>2</sub> -O <sub>2</sub> ] | 5.6             | 20600                           | 15230                                                     | 4770                                     | 4480                            | 18230                                        | 551                                   |
| [OS-OS]                           | 5.8             | 16040                           | 25870                                                     | 3580                                     | 4300                            | 14110                                        | 655                                   |
| [S <sub>2</sub> -S <sub>2</sub> ] | 6.1             | 13850                           | 39960                                                     | 2800                                     | 4200                            | 12390                                        | 708                                   |
| [O <sub>2</sub> -S <sub>2</sub> ] | 5.8             | 15920                           | 22500                                                     | 3290                                     | 3820                            | 11790                                        | 618                                   |

$H_{ML}$  values were calculated using eq. 1.  $H_{ML}^{eff}$  values were calculated by eq. 2 and  $\Delta E_{ML}^{eff}$  values were calculated by eq. 3.

Electronic coupling distances ( $r_{ML}$ ) are the geometrical distances determined from the X-ray structures. Spectroscopic data were extracted from the spectra of the neutral complexes [Mo<sub>2</sub>-Mo<sub>2</sub>].

$$H_{ML}^{eff} = \frac{H_{ML}^2}{2\Delta E_{ML}^{eff}} \quad (3)$$

$$\frac{1}{\Delta E_{ML}^{eff}} = 0.5 \times \left( \frac{1}{E_{MLCT} - E_{IT}} + \frac{1}{E_{MLCT}} \right) \quad (4)$$

**Table S3.** Effective energy gaps ( $\Delta E_{LM}^{eff}$ ) and effective coupling constants ( $H_{LM}^{eff}$ ) for ligand to metal transition.

| complex                                        | $r_{LM}$<br>(Å) | $\varepsilon_{LM}$<br>(M <sup>-1</sup> cm <sup>-1</sup> ) | $\Delta\nu_{1/2}$<br>(cm <sup>-1</sup> ) | $E_{LM}$<br>(cm <sup>-1</sup> ) | $H_{LM}$<br>(cm <sup>-1</sup> ) | $\Delta E_{LM}^{eff}$<br>(cm <sup>-1</sup> ) | $H_{LM}^{eff}$<br>(cm <sup>-1</sup> ) |
|------------------------------------------------|-----------------|-----------------------------------------------------------|------------------------------------------|---------------------------------|---------------------------------|----------------------------------------------|---------------------------------------|
| [O <sub>2</sub> -O <sub>2</sub> ] <sup>+</sup> | 5.6             | 0                                                         | 0                                        | 0                               | 0                               | 0                                            | 0                                     |
| [OS-OS] <sup>+</sup>                           | 5.8             | 5450                                                      | 2680                                     | 12330                           | 1500                            | 10330                                        | 109                                   |
| [S <sub>2</sub> -S <sub>2</sub> ] <sup>+</sup> | 6.1             | 17500                                                     | 1350                                     | 10630                           | 1700                            | 9120                                         | 156                                   |
| [O <sub>2</sub> -S <sub>2</sub> ] <sup>+</sup> | 5.8             | 2780                                                      | 3570                                     | 12970                           | 1260                            | 8580                                         | 93                                    |

$H_{LM}$  values were calculated according to eq. 1.  $H_{LM}^{eff}$  values were calculated by eq. 4 and  $\Delta E_{LM}^{eff}$  values were calculated by eq. 5. Spectroscopic data were extracted from the spectra of the mixed-valence complexes [Mo<sub>2</sub>-Mo<sub>2</sub>]<sup>+</sup>. It is assumed that  $r_{LM} \approx r_{ML}$  and  $r_{LM'} \approx r_{ML'}$ .

$$H_{LM}^{eff} = \frac{H_{LM}^2}{2\Delta E_{LM}^{eff}} \quad (5)$$

$$\frac{1}{\Delta E_{LM}^{eff}} = 0.5 \times \left( \frac{1}{E_{LMCT} - E_{IT}} + \frac{1}{E_{LM}} \right) \quad (6)$$

**Table S4.** Comparison between  $H_{ab}$  from Hush model and  $H_{MM'}$  from CNS model.

| complex                     | $H_{ab}(\text{cm}^{-1})^a$<br>( $r_{ab} = \text{Mo}_2 \cdots \text{Mo}_2$ ) | $H_{ab}(\text{cm}^{-1})^b$<br>( $r_{ab}' = 5.8 \text{ \AA}$ ) | $H_{ML}^{\text{eff}}$<br>( $\text{cm}^{-1}$ ) | $H_{LM}^{\text{eff}}$<br>( $\text{cm}^{-1}$ ) | $H_{MM'}$<br>( $\text{cm}^{-1}$ ) |
|-----------------------------|-----------------------------------------------------------------------------|---------------------------------------------------------------|-----------------------------------------------|-----------------------------------------------|-----------------------------------|
| $[\text{O}_2\text{-O}_2]^+$ | 304                                                                         | 589                                                           | 551                                           | 0                                             | 551                               |
| $[\text{OS-OS}]^+$          | 360                                                                         | 727                                                           | 655                                           | 109                                           | 764                               |
| $[\text{S}_2\text{-S}_2]^+$ | 410                                                                         | 864                                                           | 708                                           | 156                                           | 864                               |
| $[\text{O}_2\text{-S}_2]^+$ | NA                                                                          | NA                                                            | 618                                           | 93                                            | 711                               |

$H_{MM'}$  values were calculated by summation of  $H_{ML}^{\text{eff}}$  and  $H_{LM}^{\text{eff}}$  (eq. 7).

$$H_{MM'} = H_{ML}^{\text{eff}} + H_{LM}^{\text{eff}} \quad (7)$$

**Table S5.** Electron transfer kinetics for the symmetrical complexes based on the electronic coupling matrix elements from Hush and CNS methods.

| complex                     | Hush                      |                                      |                         | CNS                       |                                       |                         |
|-----------------------------|---------------------------|--------------------------------------|-------------------------|---------------------------|---------------------------------------|-------------------------|
|                             | $\nu_{el}(\text{s}^{-1})$ | $\Delta G^*$<br>( $\text{cm}^{-1}$ ) | $k_{et}(\text{s}^{-1})$ | $\nu_{el}(\text{s}^{-1})$ | $\square G^*$<br>( $\text{cm}^{-1}$ ) | $k_{et}(\text{s}^{-1})$ |
| $[\text{O}_2\text{-O}_2]^+$ | $1.2 \times 10^{14}$      | 553                                  | $3.5 \times 10^{11}$    | $1.1 \times 10^{14}$      | 581                                   | $3.0 \times 10^{11}$    |
| $[\text{OS-OS}]^+$          | $2.1 \times 10^{14}$      | 287                                  | $1.2 \times 10^{12}$    | $2.3 \times 10^{14}$      | 266                                   | $1.4 \times 10^{12}$    |
| $[\text{S}_2\text{-S}_2]^+$ | $3.4 \times 10^{14}$      | 79                                   | $3.4 \times 10^{12}$    | $3.4 \times 10^{14}$      | 79                                    | $3.4 \times 10^{12}$    |

For the symmetrical complexes,  $\lambda = E_{IT}$ . The free energies of activation were calculated from eq. 7. Electronic frequencies calculated from eq. 8 are in order of  $10^{14} \text{ s}^{-1}$  and the rates of ET reactions were calculated from eq. 9, where  $\kappa=1$  and  $\nu_n = 5 \times 10^{12} \text{ s}^{-1}$ .

$$\Delta G^* = \frac{(\lambda - 2H)^2}{4\lambda} \quad (8)$$

$$\nu_{el} = \frac{2H^2}{h} \sqrt{\frac{\pi^3}{\lambda RT}} \quad (9)$$

$$k_{et} = \kappa \nu_n \exp(-\Delta G^* / k_B T) \quad (10)$$



**Table S6.** Electron transfer kinetics for the unsymmetrical complexes based on the electronic coupling matrix elements from CNS methods.

| complex                                                  | diabatic                                  |                             | adiabatic                                          |                             |
|----------------------------------------------------------|-------------------------------------------|-----------------------------|----------------------------------------------------|-----------------------------|
|                                                          | $\Delta G^*$ (dia)<br>(cm <sup>-1</sup> ) | $k_{et}$ (s <sup>-1</sup> ) | $\square \Delta G^*$ (adia)<br>(cm <sup>-1</sup> ) | $k_{et}$ (s <sup>-1</sup> ) |
| [O <sub>2</sub> -S <sub>2</sub> ] <sup>+</sup> (forward) | 2482                                      | $3.1 \times 10^7$           | 2430                                               | $4.1 \times 10^7$           |
| [O <sub>2</sub> -S <sub>2</sub> ] <sup>+</sup> (reverse) | 256                                       | $1.5 \times 10^{12}$        | 364                                                | $8.6 \times 10^{11}$        |

For the unsymmetrical complex, the diabatic free energies of activation ( $\Delta G_{dia}^*$ ) were calculated from eq.11 and the adiabatic  $\Delta G_{adia}^\circ$  and  $\Delta G_{adia}^*$  were calculated using eq. 12 and 13 based on the  $H_{MM'}$  derived from the CNS equations (ref. 42 in the text).

$$\Delta G^* = \frac{\lambda}{4} \left( 1 + \frac{\Delta G^0}{\lambda} \right)^2 \quad (11)$$

$$\Delta G_{ad}^\circ = \Delta G^\circ \left( 1 - \frac{2H_{ab}^2}{(\lambda + \Delta G^\circ)(\lambda - \Delta G^\circ)} \right) \quad (12)$$

With  $\Delta G^\circ = 2226 \text{ cm}^{-1}$ ,  $H_{ab} = 711 \text{ cm}^{-1}$  and  $\lambda = 4334 \text{ cm}^{-1}$

$$\Rightarrow \Delta G_{ad}^\circ = 2063 \text{ cm}^{-1}$$

$$\Delta G^*(adia) = \frac{\lambda}{4} + \frac{\Delta G^\circ}{2} + \frac{(\Delta G^\circ)^2}{4(\lambda - 2H_{ab})} - H_{ab} + \frac{H_{ab}^2}{(\lambda + \Delta G^\circ)} \quad (13)$$
